# Supplementary material for: Association of nephrolithiasis with the risk of cardiovascular diseases: a longitudinal follow-up study using a national health screening cohort
Source: HighWire-hosted journal article supplement (doi:10.1136/bmjopen-2020-040034), 2020-11-01
Supplement: bmjopen-2020-040034supp003_data_supplement.pdf [file bmjopen-2020-040034supp003_data_supplement.pdf]

**Table S3** Crude and adjusted hazard ratios (95% confidence interval) for stroke in the nephrolithiasis and control groups according to the severity of nephrolithiasis

| Characteristics                                                          | Hazard ratios for stroke |         |                  |         |
|--------------------------------------------------------------------------|--------------------------|---------|------------------|---------|
|                                                                          | Crude†                   | P-value | Adjusted†‡       | P-value |
| Mild to moderate nephrolithiasis and matched control groups (n = 55,740) |                          |         |                  |         |
| Nephrolithiasis                                                          | 1.15 (1.07-1.24)         | <0.001* | 1.14 (1.06-1.23) | <0.001* |
| Control                                                                  | 1.00                     |         | 1.00             |         |
| Severe nephrolithiasis and matched control groups (n = 39,775)           |                          |         |                  |         |
| Nephrolithiasis                                                          | 1.24 (1.14-1.35)         | <0.001* | 1.23 (1.12-1.34) | <0.001* |
| Control                                                                  | 1.00                     |         | 1.00             |         |

\* Cox proportional hazard regression model, significance at  $P < 0.05$

† Models stratified by age, sex, income, and region of residence.

‡ Adjusted for obesity, smoking, alcohol consumption, fasting blood glucose, total cholesterol, and CCI scores.
